# Supplementary material for: Ordered Assembly of Fluorinated Graphene with Nano Fuels for Coupling Reaction and Application in Microenergetic Devices
Source: Research Square preprint supplement (doi:10.21203/rs.3.rs-6869022/v1), 2025-09-03
Supplement: Supplementary file 1 [file 98bf4ea1ef9d8ea5065a153a.docx]

**Supporting information**

**Ordered assembly of fluorinated graphene with nano fuels for coupling reaction and application in microenergetic devices**


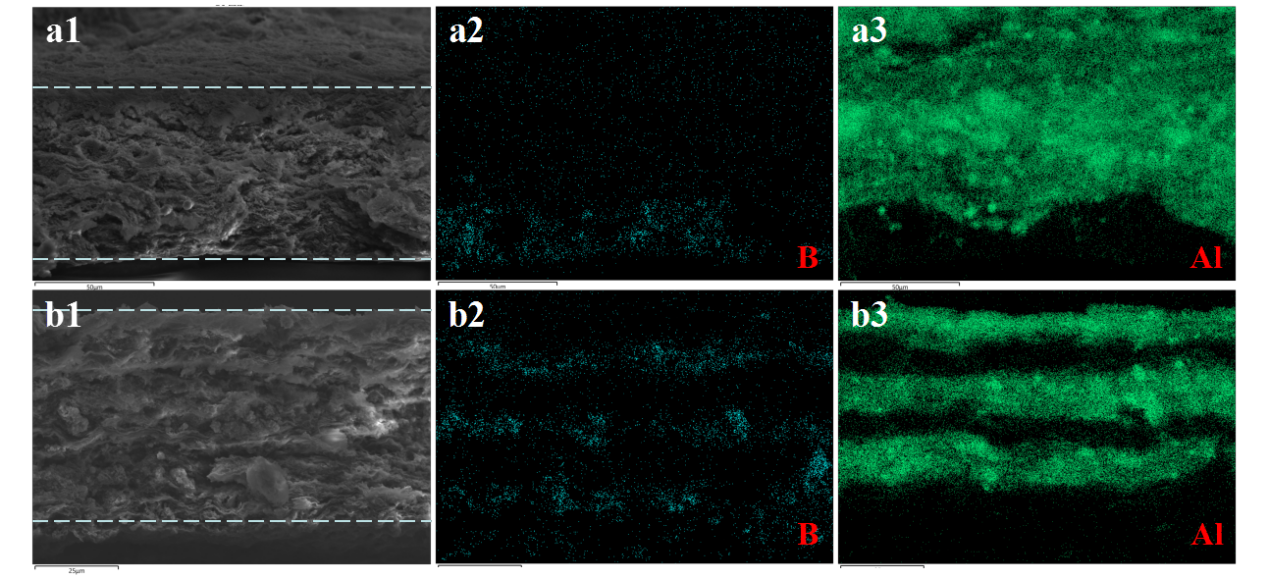


**Figure S1 The SEM and EDS images with B and Al elements of M2 (a) and M6 (b) bionic films, respectively.**


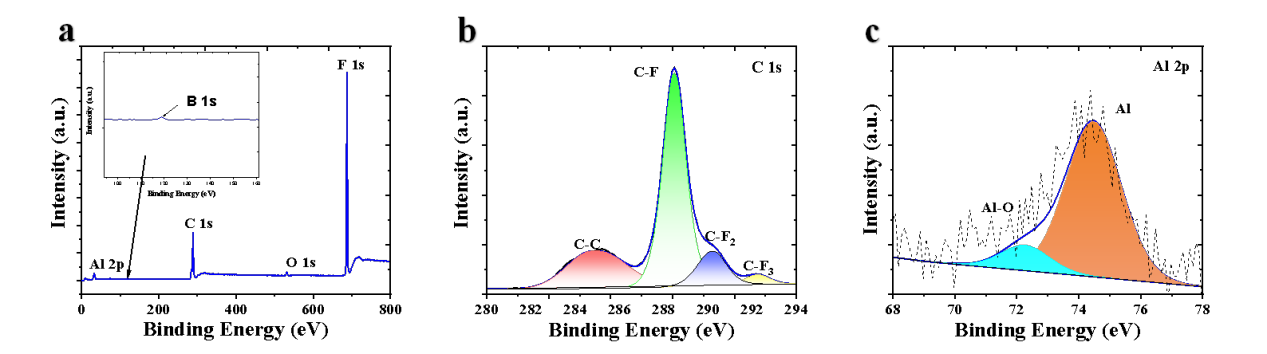


**Figure S2 (a) XPS survey spectra between 0 and 800 eV. High resolution XPS spectra for (b) C 1s and (c) Al 2p of the M4 film.**


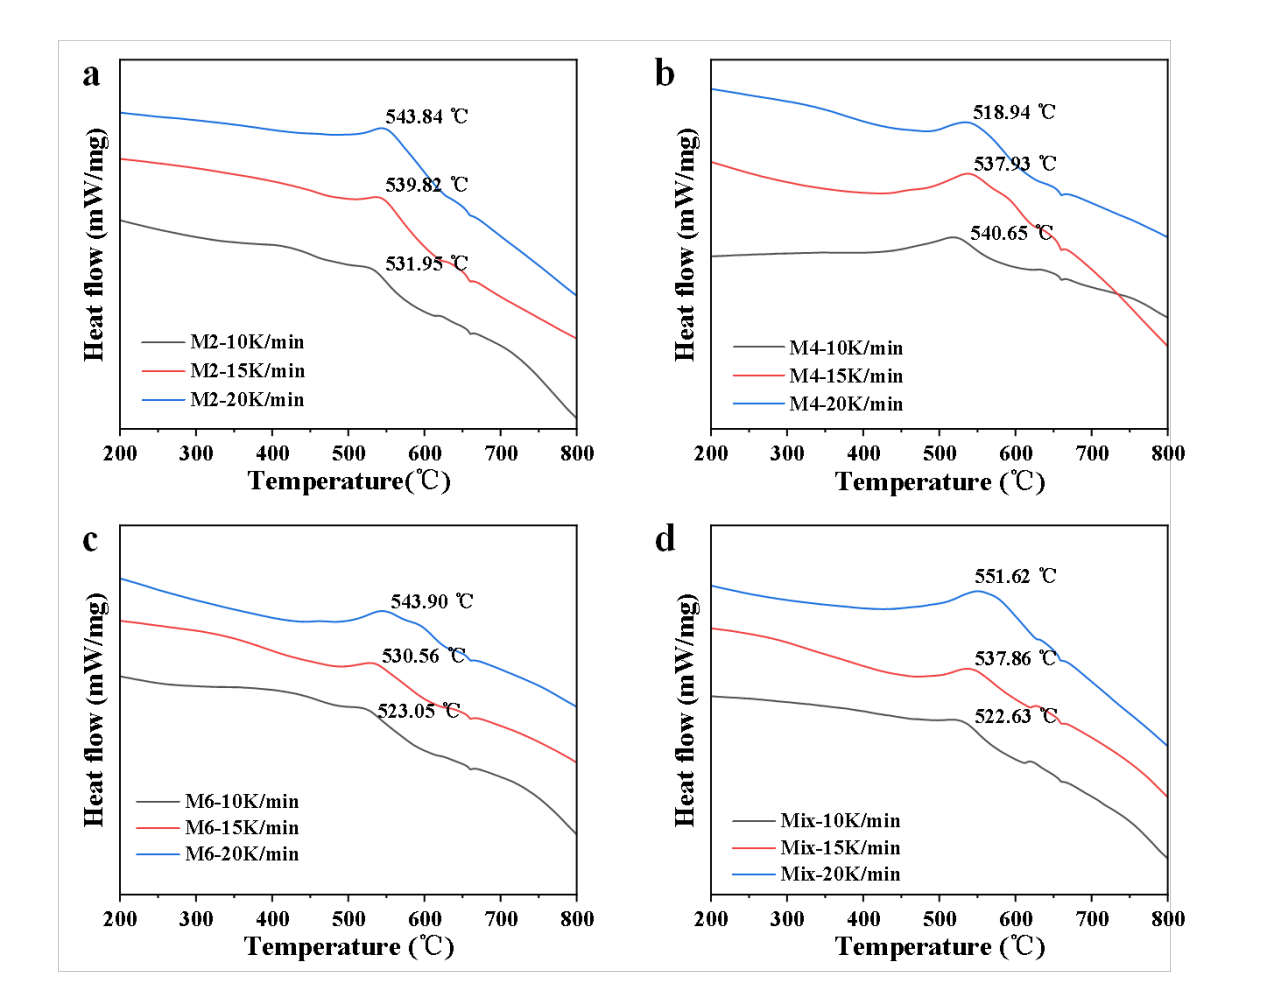
**Figure S3 DSC curves of Al@FG/B@FG bionic films under the heating rate of 10, 15, and 20 K/min.**


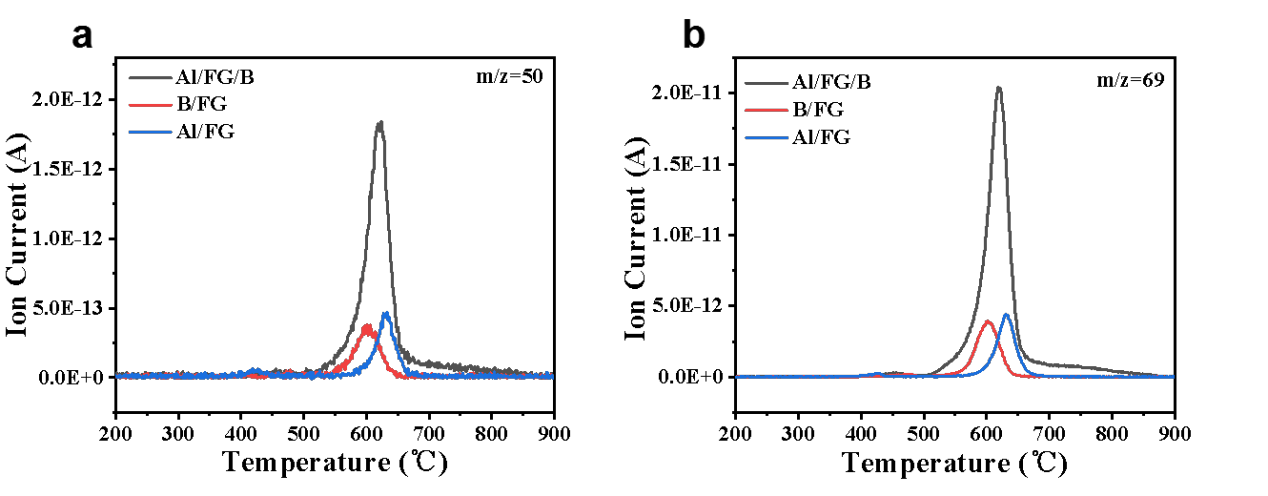


**Figure S4 Real-time MS results of Al@FG/B@FG bionic films under with different composite under the heating rate of 10 K/min.**


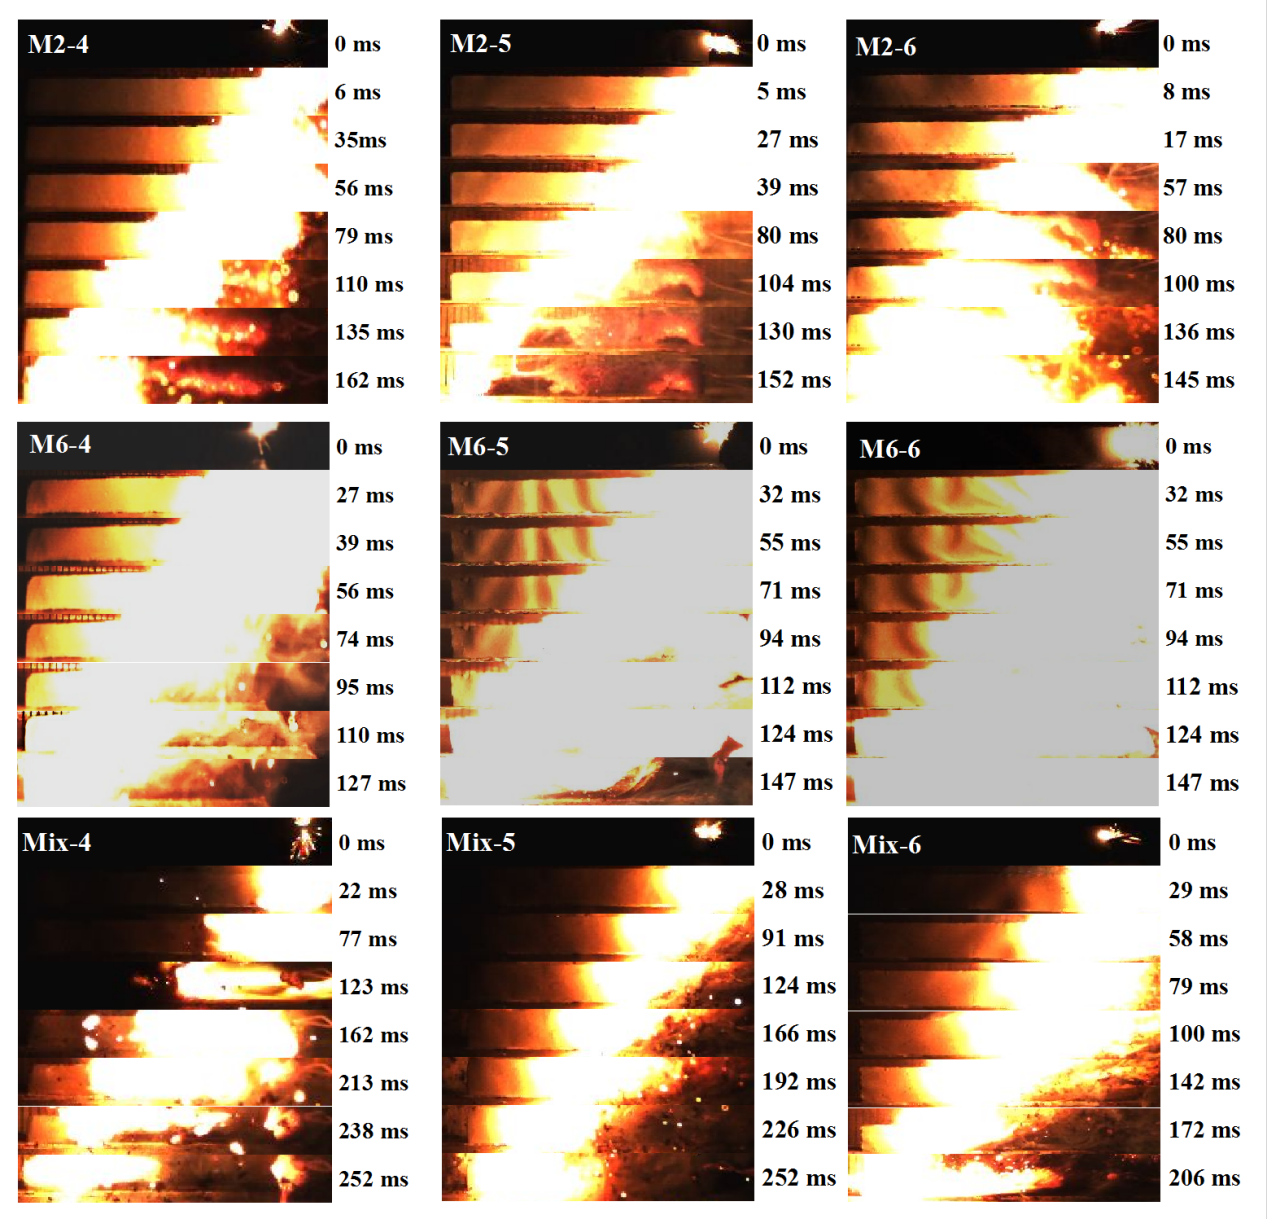


**Figure S5 The evolution process images of Al@FG/B@FG bionic films with different width and layer.**


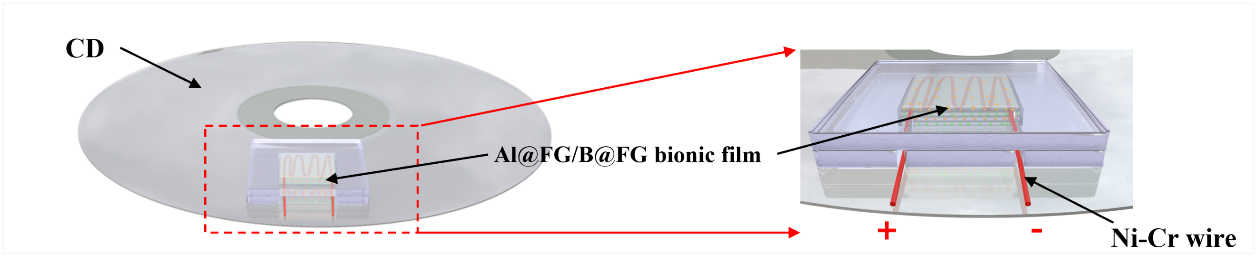


**Figure S6 Schematic of experimental apparatus for transience destruction performance test of CD.**


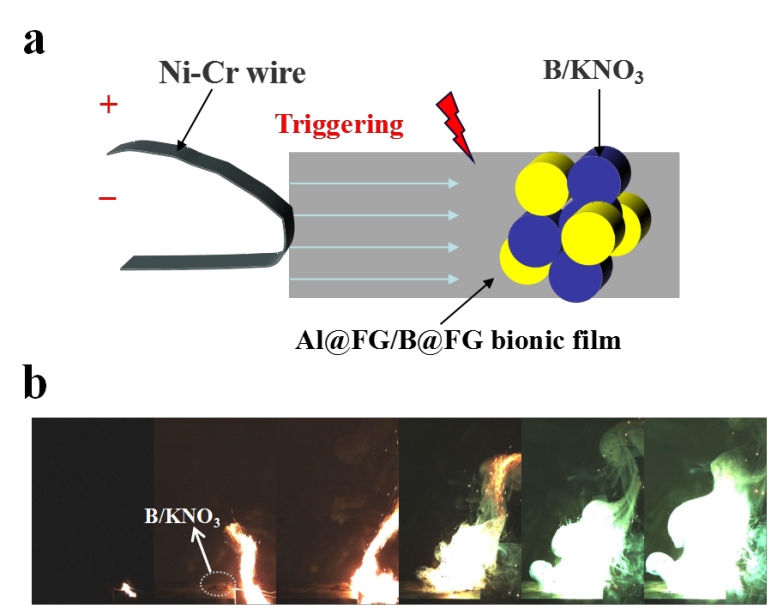


**Figure S7 Schematic diagram of the ignition of B/KNO3 through the Al@FG/B@FG bionic film (a) and the corresponding high-speed photographic image (b).**
